# Supplementary material for: Letter on “Sharing trial results directly with trial participants and other stakeholders after the SARS-CoV-2 pandemic hit the UK – experience from the ActWELL trial”
Source: Springer Nature journal article supplement (doi:10.1186/s13063-021-05340-3), 2021-06-05
Supplement: MOESM5 [file 19232452]

## Expenditure for ActWELL online events

| Item                                                                                                                                                                                      | Cost             |
|-------------------------------------------------------------------------------------------------------------------------------------------------------------------------------------------|------------------|
| Postal invitations for ActWELL participants (n=38)<br>-printing and posting by HIC Dundee                                                                                                 | £29.64           |
| Email invitation to most participants (n=400 out of 464)<br>-combined cost for setting up and management of postal/email contact by HIC Dundee                                            | £720.00          |
| BCN email invitations to coaches (BCN/ActWELL Team)                                                                                                                                       | £0.00            |
| Email invitations to leisure centres (ActWELL Team)                                                                                                                                       | £0.00            |
| Email invitations of breast screening centres and mobile units (ActWELL Team)                                                                                                             | £0.00            |
| Registration management - Eventbrite (ActWELL Team)                                                                                                                                       | £0.00            |
| Event evaluation through Eventbrite and SurveyMonkey (ActWELL Team)                                                                                                                       | £0.00            |
| Tech support at live events - Cormac Staunton ( <a href="https://stauntonmedia.ie/">https://stauntonmedia.ie/</a> )<br>-test, recording best practice; at event tech support, break music | £770.00          |
| Live captioning using Otter.ai ( <a href="https://otter.ai">https://otter.ai</a> )<br>-Free one month trial but reduction for Higher Education Institutions also available                | £0.00            |
| Zoom pro licence for 2 months<br>-need organisation VAT number to pay                                                                                                                     | £23.98           |
| Zoom large meeting add-on for 2 months<br>-need organisation VAT number to pay                                                                                                            | £80.00           |
| <b>TOTAL COST</b>                                                                                                                                                                         | <b>£1,623.62</b> |
| <b>In addition staff hours should be added to the cost<br/>See breakdown of staff hours on next page</b>                                                                                  | <b>40 hours</b>  |

## Staff hours (1 person)

| Activity                                                                       | Comment                                                       | Estimated hours |
|--------------------------------------------------------------------------------|---------------------------------------------------------------|-----------------|
| Meetings with ActWELL lead during planning stage                               | Also via email                                                | 4               |
| Quotes for tech help x3                                                        | 3x meetings (various emails)                                  | 4               |
| Platform - meeting about MS Teams                                              | 1xmeeting                                                     | 1               |
| Platform - institutional issues around Zoom                                    | 1xmeeting and emails                                          | 1               |
| Drafting invitations and amendment after team review                           |                                                               | 1               |
| Drafting evaluation plan and survey and amendments after team review           |                                                               | 3               |
| Drafting programme and discussion with team                                    | meetings and email                                            | 1               |
| Setting up Enventbrite pages x3 including Monkeysurvey                         | 1xmeeting to test page and link                               | 3               |
| Prepare event PowerPoint Slides                                                |                                                               | 3               |
| Setup Zoom with Otter.ai                                                       |                                                               | 1               |
| Liasing with HIC to send invitations to trial participants and arrange payment |                                                               | 1               |
| Prepare mail merge invitations                                                 |                                                               | 1               |
| Respond to emails                                                              | After invitaitons, during and after events                    | 1               |
| Arrange and attend test event for team                                         |                                                               | 1               |
| Attending events                                                               | 30 mins. before, 30 mins. after event and survey distribution | 9               |
| Write report of events and evaluation survey                                   | Clean evaluation data and import into SPSS, write syntax      | 5               |
| <b>TOTAL HOURS</b>                                                             |                                                               | <b>40</b>       |
